# Supplementary material for: TRBP, a Major Component of the RNAi Machinery, Is Subjected to Cell Cycle-dependent Regulation in Human Cancer Cells of Diverse Tissue Origin
Source: Preprints.org preprint supplement (doi:10.20944/preprints202410.0640.v1), 2024-10-09
Supplement: Supplementary file 1 [file supplementary]

## Sheet: Φύλλο1
PACT Interactors
Interactor	Description
AATF	apoptosis antagonizing transcription factor
ABT1	activator of basal transcription 1
ADAR	adenosine deaminase, RNA-specific
ADARB1	adenosine deaminase, RNA-specific, B1
AGO2	argonaute RISC catalytic component 2
ANLN	anillin, actin binding protein
APEX1	APEX nuclease (multifunctional DNA repair enzyme) 1
APOBEC3D	apolipoprotein B mRNA editing enzyme, catalytic polypeptide-like 3D
APOBEC3F	apolipoprotein B mRNA editing enzyme, catalytic polypeptide-like 3F
AURKAIP1	aurora kinase A interacting protein 1
BAP1	BRCA1 associated protein-1 (ubiquitin carboxy-terminal hydrolase)
BEND7	BEN domain containing 7
BMI1	BMI1 proto-oncogene, polycomb ring finger
BMS1	BMS1 ribosome biogenesis factor
BOP1	block of proliferation 1
BRCA1	breast cancer 1, early onset
BRIX1	BRX1, biogenesis of ribosomes, homolog (S. cerevisiae)
BTF3	basic transcription factor 3
BTRC	beta-transducin repeat containing E3 ubiquitin protein ligase
BUD13	BUD13 homolog (S. cerevisiae)
C1ORF35	chromosome 1 open reading frame 35
C7ORF50	chromosome 7 open reading frame 50
C8ORF33	chromosome 8 open reading frame 33
CAND1	cullin-associated and neddylation-dissociated 1
CBX6	chromobox homolog 6
CCDC124	coiled-coil domain containing 124
CCDC137	coiled-coil domain containing 137
CCDC59	coiled-coil domain containing 59
CCDC86	coiled-coil domain containing 86
CDK12	cyclin-dependent kinase 12
CDKN2AIP	CDKN2A interacting protein
CEBPZ	CCAAT/enhancer binding protein (C/EBP), zeta
CENPC	centromere protein C
CENPL	centromere protein L
CENPN	centromere protein N
CENPU	centromere protein U
CHERP	calcium homeostasis endoplasmic reticulum protein
COPS6	COP9 signalosome subunit 6
CTCF	CCCTC-binding factor (zinc finger protein)
DCAF4	DDB1 and CUL4 associated factor 4
DDRGK1	DDRGK domain containing 1
DDX10	DEAD (Asp-Glu-Ala-Asp) box polypeptide 10
DDX18	DEAD (Asp-Glu-Ala-Asp) box polypeptide 18
DDX21	DEAD (Asp-Glu-Ala-Asp) box helicase 21
DDX24	DEAD (Asp-Glu-Ala-Asp) box helicase 24
DDX27	DEAD (Asp-Glu-Ala-Asp) box polypeptide 27
DDX31	DEAD (Asp-Glu-Ala-Asp) box polypeptide 31
DDX50	DEAD (Asp-Glu-Ala-Asp) box polypeptide 50
DDX51	DEAD (Asp-Glu-Ala-Asp) box polypeptide 51
DDX54	DEAD (Asp-Glu-Ala-Asp) box polypeptide 54
DDX55	DEAD (Asp-Glu-Ala-Asp) box polypeptide 55
DDX56	DEAD (Asp-Glu-Ala-Asp) box helicase 56
DDX58	DEAD (Asp-Glu-Ala-Asp) box polypeptide 58
DGCR8	DGCR8 microprocessor complex subunit
DHX30	DEAH (Asp-Glu-Ala-His) box helicase 30
DHX9	DEAH (Asp-Glu-Ala-His) box helicase 9
DICER1	dicer 1, ribonuclease type III
DKC1	dyskeratosis congenita 1, dyskerin
DRG1	developmentally regulated GTP binding protein 1
DUS2	dihydrouridine synthase 2
EBNA1BP2	EBNA1 binding protein 2
EHD1	EH-domain containing 1
EHHADH	enoyl-CoA, hydratase/3-hydroxyacyl CoA dehydrogenase
EIF2AK2	eukaryotic translation initiation factor 2-alpha kinase 2
ELAVL2	ELAV like neuron-specific RNA binding protein 2
ELAVL4	ELAV like neuron-specific RNA binding protein 4
EPB41L4B	erythrocyte membrane protein band 4.1 like 4B
EPB41L5	erythrocyte membrane protein band 4.1 like 5
ESR1	estrogen receptor 1
FAM111A	family with sequence similarity 111, member A
FAM120A	family with sequence similarity 120A
FAU	Finkel-Biskis-Reilly murine sarcoma virus (FBR-MuSV) ubiquitously expressed
FBF1	Fas (TNFRSF6) binding factor 1
FBXW7	F-box and WD repeat domain containing 7, E3 ubiquitin protein ligase
FCF1	FCF1 rRNA-processing protein
FGF13	fibroblast growth factor 13
FGFBP1	fibroblast growth factor binding protein 1
FOXA1	forkhead box A1
FTSJ3	FtsJ homolog 3 (E. coli)
FXR2	fragile X mental retardation, autosomal homolog 2
FYTTD1	forty-two-three domain containing 1
G3BP1	GTPase activating protein (SH3 domain) binding protein 1
GAR1	GAR1 ribonucleoprotein
GDF9	growth differentiation factor 9
GLE1	GLE1 RNA export mediator
GLTSCR2	glioma tumor suppressor candidate region gene 2
GLYR1	glyoxylate reductase 1 homolog (Arabidopsis)
GNL2	guanine nucleotide binding protein-like 2 (nucleolar)
GNL3	guanine nucleotide binding protein-like 3 (nucleolar)
GTPBP10	GTP-binding protein 10 (putative)
GTPBP4	GTP binding protein 4
GZF1	GDNF-inducible zinc finger protein 1
H1F0	H1 histone family, member 0
H2AFJ	H2A histone family, member J
H2AFX	H2A histone family, member X
HERC5	HECT and RLD domain containing E3 ubiquitin protein ligase 5
HIST1H1A	histone cluster 1, H1a
HIST1H1B	histone cluster 1, H1b
HIST1H1C	histone cluster 1, H1c
HIST1H1E	histone cluster 1, H1e
HIST1H2AG	histone cluster 1, H2ag
HIST1H2AM	histone cluster 1, H2am
HIST1H2BD	histone cluster 1, H2bd
HIST1H2BO	histone cluster 1, H2bo
HIST2H2AC	histone cluster 2, H2ac
HMGN4	high mobility group nucleosomal binding domain 4
HNRNPC	heterogeneous nuclear ribonucleoprotein C (C1/C2)
HNRNPCL1	heterogeneous nuclear ribonucleoprotein C-like 1
HNRNPCL2	heterogeneous nuclear ribonucleoprotein C-like 2
HNRNPM	heterogeneous nuclear ribonucleoprotein M
HNRNPUL2	heterogeneous nuclear ribonucleoprotein U-like 2
HP1BP3	heterochromatin protein 1, binding protein 3
HSPA8	heat shock 70kDa protein 8
IFI16	interferon, gamma-inducible protein 16
IFIH1	interferon induced with helicase C domain 1
IFIT5	interferon-induced protein with tetratricopeptide repeats 5
IFRD2	interferon-related developmental regulator 2
IGF2BP1	insulin-like growth factor 2 mRNA binding protein 1
IL17B	interleukin 17B
ILF2	interleukin enhancer binding factor 2
ILF3	interleukin enhancer binding factor 3, 90kDa
IMP4	IMP4, U3 small nucleolar ribonucleoprotein
INO80B	INO80 complex subunit B
ITFG1	integrin alpha FG-GAP repeat containing 1
KAT6A	K(lysine) acetyltransferase 6A
KIAA0020	KIAA0020
KIAA1377	KIAA1377
KMT2A	lysine (K)-specific methyltransferase 2A
KNOP1	lysine-rich nucleolar protein 1
KRR1	KRR1, small subunit (SSU) processome component, homolog (yeast)
LAMP1	lysosomal-associated membrane protein 1
LARP7	La ribonucleoprotein domain family, member 7
LIN28A	lin-28 homolog A (C. elegans)
LIN28B	lin-28 homolog B (C. elegans)
LLPH	LLP homolog, long-term synaptic facilitation (Aplysia)
LNX1	ligand of numb-protein X 1, E3 ubiquitin protein ligase
LYAR	Ly1 antibody reactive
MAGEB10	melanoma antigen family B, 10
MAGEB2	melanoma antigen family B, 2
MAK16	MAK16 homolog (S. cerevisiae)
MAP3K14	mitogen-activated protein kinase kinase kinase 14
MAP4K2	mitogen-activated protein kinase kinase kinase kinase 2
MAP7D1	MAP7 domain containing 1
MAPT	microtubule-associated protein tau
MAST1	microtubule associated serine/threonine kinase 1
MB21D1	Mab-21 domain containing 1
MDC1	mediator of DNA-damage checkpoint 1
MOV10	Mov10 RISC complex RNA helicase
MPHOSPH10	M-phase phosphoprotein 10 (U3 small nucleolar ribonucleoprotein)
MTPAP	mitochondrial poly(A) polymerase
MYBBP1A	MYB binding protein (P160) 1a
MYC	v-myc avian myelocytomatosis viral oncogene homolog
MYCN	v-myc avian myelocytomatosis viral oncogene neuroblastoma derived homolog
MYEF2	myelin expression factor 2
NCL	nucleolin
NEIL1	nei endonuclease VIII-like 1 (E. coli)
NEIL3	nei endonuclease VIII-like 3 (E. coli)
NF1	neurofibromin 1
NHLRC2	NHL repeat containing 2
NIFK	nucleolar protein interacting with the FHA domain of MKI67
NIP7	NIP7, nucleolar pre-rRNA processing protein
NKRF	NFKB repressing factor
NLE1	notchless homolog 1 (Drosophila)
NOC2L	nucleolar complex associated 2 homolog (S. cerevisiae)
NOC3L	nucleolar complex associated 3 homolog (S. cerevisiae)
NOL10	nucleolar protein 10
NOL12	nucleolar protein 12
NOL8	nucleolar protein 8
NOM1	nucleolar protein with MIF4G domain 1
NOP10	NOP10 ribonucleoprotein
NOP16	NOP16 nucleolar protein
NOP2	NOP2 nucleolar protein
NPM1	nucleophosmin (nucleolar phosphoprotein B23, numatrin)
NPM3	nucleophosmin/nucleoplasmin 3
NSA2	NSA2 ribosome biogenesis homolog (S. cerevisiae)
NSUN4	NOP2/Sun domain family, member 4
NUPL2	nucleoporin like 2
NVL	nuclear VCP-like
OASL	2'-5'-oligoadenylate synthetase-like
OBSL1	obscurin-like 1
PABPC5	poly(A) binding protein, cytoplasmic 5
PAIP2B	poly(A) binding protein interacting protein 2B
PAK1IP1	PAK1 interacting protein 1
PAPD5	PAP associated domain containing 5
PARK2	parkin RBR E3 ubiquitin protein ligase
PCBP1	poly(rC) binding protein 1
PDCD11	programmed cell death 11
PIAS2	protein inhibitor of activated STAT, 2
PLEKHA4	pleckstrin homology domain containing, family A (phosphoinositide binding specific) member 4
POLR2G	polymerase (RNA) II (DNA directed) polypeptide G
POLRMT	polymerase (RNA) mitochondrial (DNA directed)
POP1	processing of precursor 1, ribonuclease P/MRP subunit (S. cerevisiae)
PPAN-P2RY11	PPAN-P2RY11 readthrough
PPIE	peptidylprolyl isomerase E (cyclophilin E)
PRDM10	PR domain containing 10
PRDM15	PR domain containing 15
PRKRA	protein kinase, interferon-inducible double stranded RNA dependent activator
PRKRIR	protein-kinase, interferon-inducible double stranded RNA dependent inhibitor, repressor of (P58 repressor)
PRPF4B	pre-mRNA processing factor 4B
PRPSAP1	phosphoribosyl pyrophosphate synthetase-associated protein 1
PRR11	proline rich 11
PRR3	proline rich 3
PTBP3	polypyrimidine tract binding protein 3
PURA	purine-rich element binding protein A
PURB	purine-rich element binding protein B
PURG	purine-rich element binding protein G
RABEPK	Rab9 effector protein with kelch motifs
RAF1	Raf-1 proto-oncogene, serine/threonine kinase
RALYL	RALY RNA binding protein-like
RASL10A	RAS-like, family 10, member A
RBM19	RNA binding motif protein 19
RBM28	RNA binding motif protein 28
RBM3	RNA binding motif (RNP1, RRM) protein 3
RBM34	RNA binding motif protein 34
RBM39	RNA binding motif protein 39
RBM4	RNA binding motif protein 4
RBMX2	RNA binding motif protein, X-linked 2
RBPJ	recombination signal binding protein for immunoglobulin kappa J region
RBPMS	RNA binding protein with multiple splicing
RC3H1	ring finger and CCCH-type domains 1
RC3H2	ring finger and CCCH-type domains 2
REPIN1	replication initiator 1
REXO4	REX4, RNA exonuclease 4 homolog (S. cerevisiae)
RFC1	replication factor C (activator 1) 1, 145kDa
RNF113A	ring finger protein 113A
RNF151	ring finger protein 151
RNMTL1	RNA methyltransferase like 1
RPA1	replication protein A1, 70kDa
RPA3	replication protein A3, 14kDa
RPF1	ribosome production factor 1 homolog (S. cerevisiae)
RPF2	ribosome production factor 2 homolog (S. cerevisiae)
RPL10	ribosomal protein L10
RPL10A	ribosomal protein L10a
RPL11	ribosomal protein L11
RPL12	ribosomal protein L12
RPL13	ribosomal protein L13
RPL13A	ribosomal protein L13a
RPL15	ribosomal protein L15
RPL17	ribosomal protein L17
RPL18	ribosomal protein L18
RPL18A	ribosomal protein L18a
RPL19	ribosomal protein L19
RPL21	ribosomal protein L21
RPL22	ribosomal protein L22
RPL23A	ribosomal protein L23a
RPL26	ribosomal protein L26
RPL26L1	ribosomal protein L26-like 1
RPL27	ribosomal protein L27
RPL27A	ribosomal protein L27a
RPL28	ribosomal protein L28
RPL3	ribosomal protein L3
RPL30	ribosomal protein L30
RPL31	ribosomal protein L31
RPL32	ribosomal protein L32
RPL34	ribosomal protein L34
RPL35	ribosomal protein L35
RPL35A	ribosomal protein L35a
RPL36	ribosomal protein L36
RPL36AL	ribosomal protein L36a-like
RPL37A	ribosomal protein L37a
RPL4	ribosomal protein L4
RPL5	ribosomal protein L5
RPL6	ribosomal protein L6
RPL7	ribosomal protein L7
RPL7A	ribosomal protein L7a
RPL7L1	ribosomal protein L7-like 1
RPL8	ribosomal protein L8
RPL9	ribosomal protein L9
RPLP0	ribosomal protein, large, P0
RPLP1	ribosomal protein, large, P1
RPLP2	ribosomal protein, large, P2
RPS11	ribosomal protein S11
RPS13	ribosomal protein S13
RPS14	ribosomal protein S14
RPS15	ribosomal protein S15
RPS15A	ribosomal protein S15a
RPS2	ribosomal protein S2
RPS23	ribosomal protein S23
RPS24	ribosomal protein S24
RPS26	ribosomal protein S26
RPS26P11	ribosomal protein S26 pseudogene 11
RPS27A	ribosomal protein S27a
RPS3	ribosomal protein S3
RPS3A	ribosomal protein S3A
RPS4Y2	ribosomal protein S4, Y-linked 2
RPS6	ribosomal protein S6
RPS8	ribosomal protein S8
RPS9	ribosomal protein S9
RRP15	ribosomal RNA processing 15 homolog (S. cerevisiae)
RRP1B	ribosomal RNA processing 1B
RRP8	ribosomal RNA processing 8, methyltransferase, homolog (yeast)
RRS1	RRS1 ribosome biogenesis regulator homolog (S. cerevisiae)
RSBN1	round spermatid basic protein 1
RSBN1L	round spermatid basic protein 1-like
RSL1D1	ribosomal L1 domain containing 1
RSL24D1	ribosomal L24 domain containing 1
SDAD1	SDA1 domain containing 1
SETDB1	SET domain, bifurcated 1
SHC1	SHC (Src homology 2 domain containing) transforming protein 1
SIRT7	sirtuin 7
SNCA	synuclein, alpha (non A4 component of amyloid precursor)
SNRNP70	small nuclear ribonucleoprotein 70kDa (U1)
SNX5	sorting nexin 5
SOX2	SRY (sex determining region Y)-box 2
SPATA5L1	spermatogenesis associated 5-like 1
SPATS2	spermatogenesis associated, serine-rich 2
SPATS2L	spermatogenesis associated, serine-rich 2-like
SPTY2D1	SPT2, Suppressor of Ty, domain containing 1 (S. cerevisiae)
SREK1	splicing regulatory glutamine/lysine-rich protein 1
SRP14	signal recognition particle 14kDa (homologous Alu RNA binding protein)
SRP68	signal recognition particle 68kDa
SRP72	signal recognition particle 72kDa
SRPK1	SRSF protein kinase 1
SRPK2	SRSF protein kinase 2
SRPK3	SRSF protein kinase 3
SRSF1	serine/arginine-rich splicing factor 1
SRSF3	serine/arginine-rich splicing factor 3
SRSF4	serine/arginine-rich splicing factor 4
SRSF5	serine/arginine-rich splicing factor 5
SRSF6	serine/arginine-rich splicing factor 6
SRSF7	serine/arginine-rich splicing factor 7
STAU1	staufen double-stranded RNA binding protein 1
STAU2	staufen double-stranded RNA binding protein 2
STK11	serine/threonine kinase 11
STRBP	spermatid perinuclear RNA binding protein
SURF6	surfeit 6
SYK	spleen tyrosine kinase
SYNCRIP	synaptotagmin binding, cytoplasmic RNA interacting protein
TAF1A	TATA box binding protein (TBP)-associated factor, RNA polymerase I, A, 48kDa
TAF1B	TATA box binding protein (TBP)-associated factor, RNA polymerase I, B, 63kDa
TAF1C	TATA box binding protein (TBP)-associated factor, RNA polymerase I, C, 110kDa
TARBP2	TAR (HIV-1) RNA binding protein 2
TBL2	transducin (beta)-like 2
TCOF1	Treacher Collins-Franceschetti syndrome 1
TIPARP	TCDD-inducible poly(ADP-ribose) polymerase
TRIM28	tripartite motif containing 28
TRIM56	tripartite motif containing 56
TRIM67	tripartite motif containing 67
TRIP12	thyroid hormone receptor interactor 12
TSPYL1	TSPY-like 1
TSPYL2	TSPY-like 2
TTF1	transcription termination factor, RNA polymerase I
UBE2I	ubiquitin-conjugating enzyme E2I
UFL1	UFM1-specific ligase 1
URB1	URB1 ribosome biogenesis 1 homolog (S. cerevisiae)
URB2	URB2 ribosome biogenesis 2 homolog (S. cerevisiae)
USP42	ubiquitin specific peptidase 42
UTP23	UTP23, small subunit (SSU) processome component, homolog (yeast)
UTP3	UTP3, small subunit (SSU) processome component, homolog (S. cerevisiae)
VHL	von Hippel-Lindau tumor suppressor, E3 ubiquitin protein ligase
WDR12	WD repeat domain 12
WDR46	WD repeat domain 46
WDR5	WD repeat domain 5
WDR74	WD repeat domain 74
WHSC1	Wolf-Hirschhorn syndrome candidate 1
WWP2	WW domain containing E3 ubiquitin protein ligase 2
XRN1	5'-3' exoribonuclease 1
YBX2	Y box binding protein 2
YBX3	Y box binding protein 3
YTHDC2	YTH domain containing 2
ZBTB11	zinc finger and BTB domain containing 11
ZBTB2	zinc finger and BTB domain containing 2
ZBTB24	zinc finger and BTB domain containing 24
ZBTB47	zinc finger and BTB domain containing 47
ZBTB48	zinc finger and BTB domain containing 48
ZC3H10	zinc finger CCCH-type containing 10
ZC3H18	zinc finger CCCH-type containing 18
ZC3HAV1	zinc finger CCCH-type, antiviral 1
ZCCHC6	zinc finger, CCHC domain containing 6
ZCCHC7	zinc finger, CCHC domain containing 7
ZFP28	ZFP28 zinc finger protein
ZFP62	ZFP62 zinc finger protein
ZKSCAN8	zinc finger with KRAB and SCAN domains 8
ZMAT3	zinc finger, matrin-type 3
ZMAT4	zinc finger, matrin-type 4
ZNF121	zinc finger protein 121
ZNF16	zinc finger protein 16
ZNF184	zinc finger protein 184
ZNF22	zinc finger protein 22
ZNF346	zinc finger protein 346
ZNF354A	zinc finger protein 354A
ZNF420	zinc finger protein 420
ZNF430	zinc finger protein 430
ZNF445	zinc finger protein 445
ZNF467	zinc finger protein 467
ZNF48	zinc finger protein 48
ZNF483	zinc finger protein 483
ZNF512	zinc finger protein 512
ZNF574	zinc finger protein 574
ZNF646	zinc finger protein 646
ZNF668	zinc finger protein 668
ZNF746	zinc finger protein 746
ZNF746	zinc finger protein 746
ZNF768	zinc finger protein 768
ZNF770	zinc finger protein 770
ZNF771	zinc finger protein 771
ZNF777	zinc finger protein 777
ZNF791	zinc finger protein 791
ZNF800	zinc finger protein 800
ZNF845	zinc finger protein 845
ZRANB1	zinc finger, RAN-binding domain containing 1
